# Supplementary material for: Functional Integration and Segregation in a Multilayer Network Model of Patients with Schizophrenia
Source: MDPI journal article supplement (doi:10.3390/brainsci12030368), 2022-03-10
Supplement: s1 [file s1]

**Table S1.** Resting-state network assignments of automated anatomical labeling (AAL) template.

| Name                 | Acronyms     | RSN          | Name                 | Acronyms | RSN          |
|----------------------|--------------|--------------|----------------------|----------|--------------|
| Precentral_L         | PreCG.L      | Sensorimotor | Lingual_L            | LING.L   | Visual       |
| Precentral_R         | PreCG.R      | Sensorimotor | Lingual_R            | LING.R   | Visual       |
| Frontal_Sup_L        | SFGdor.L     | Default node | Occipital_Sup_L      | SOG.L    | Visual       |
| Frontal_Sup_R        | SFGdor.R     | Default node | Occipital_Sup_R      | SOG.R    | Visual       |
| Frontal_Sup_Orb_L    | ORBsup.L     | Attention    | Occipital_Mid_L      | MOG.L    | Visual       |
| Frontal_Sup_Orb_R    | ORBsup.R     | Default node | Occipital_Mid_R      | MOG.R    | Visual       |
| Frontal_Mid_L        | MFG.L        | Attention    | Occipital_Inf_L      | IOG.L    | Visual       |
| Frontal_Mid_R        | MFG.R        | Attention    | Occipital_Inf_R      | IOG.R    | Visual       |
| Frontal_Mid_Orb_L    | ORBmid.L     | Attention    | Fusiform_L           | FFG.L    | Visual       |
| Frontal_Mid_Orb_R    | ORBmid.R     | Attention    | Fusiform_R           | FFG.R    | Visual       |
| Frontal_Inf_Oper_L   | IFGoperc.L   | Attention    | Postcentral_L        | PoCG.L   | Sensorimotor |
| Frontal_Inf_Oper_R   | IFGoperc.R   | Attention    | Postcentral_R        | PoCG.R   | Sensorimotor |
| Frontal_Inf_Tri_L    | IFGtriang.L  | Attention    | Parietal_Sup_L       | SPG.L    | Sensorimotor |
| Frontal_Inf_Tri_R    | IFGtriang.R  | Attention    | Parietal_Sup_R       | SPG.R    | Sensorimotor |
| Frontal_Inf_Orb_L    | ORBinf.L     | Attention    | Parietal_Inf_L       | IPL.L    | Attention    |
| Frontal_Inf_Orb_R    | ORBinf.R     | Attention    | Parietal_Inf_R       | IPL.R    | Attention    |
| Rolandic_Oper_L      | ROL.L        | Sensorimotor | SupraMarginal_L      | SMG.L    | Sensorimotor |
| Rolandic_Oper_R      | ROL.R        | Sensorimotor | SupraMarginal_R      | SMG.R    | Sensorimotor |
| Supp_Motor_Area_L    | SMA.L        | Attention    | Angular_L            | ANG.L    | Attention    |
| Supp_Motor_Area_R    | SMA.R        | Sensorimotor | Angular_R            | ANG.R    | Attention    |
| Olfactory_L          | OLF.L        | Subcortical  | Precuneus_L          | PCUN.L   | Default mode |
| Olfactory_R          | OLF.R        | Subcortical  | Precuneus_R          | PCUN.R   | Default mode |
| Frontal_Sup_Medial_L | SFGmed.L     | Default node | Paracentral_Lobule_L | PCL.L    | Sensorimotor |
| Frontal_Sup_Medial_R | SFGmed.R     | Default node | Paracentral_Lobule_R | PCL.R    | Sensorimotor |
| Frontal_Mid_Orb_L    | ORBsup-med.L | Default node | Caudate_L            | CAU.L    | Subcortical  |
| Frontal_Mid_Orb_R    | ORBsup-med.R | Default node | Caudate_R            | CAU.R    | Subcortical  |
| Rectus_L             | REC.L        | Default node | Putamen_L            | PUT.L    | Subcortical  |
| Rectus_R             | REC.R        | Default mode | Putamen_R            | PUT.R    | Subcortical  |
| Insula_L             | INS.L        | Sensorimotor | Pallidum_L           | PAL.L    | Subcortical  |
| Insula_R             | INS.R        | Sensorimotor | Pallidum_R           | PAL.R    | Subcortical  |
| Cingulum_Ant_L       | ACG.L        | Default mode | Thalamus_L           | THA.L    | Subcortical  |

| Name              | Acronyms | RSN          | Name                | Acronyms | RSN          |
|-------------------|----------|--------------|---------------------|----------|--------------|
| Cingulum_Ant_R    | ACG.R    | Default mode | Thalamus_R          | THA.R    | Subcortical  |
| Cingulum_Mid_L    | DCG.L    | Subcortical  | Heschl_L            | HES.L    | Sensorimotor |
| Cingulum_Mid_R    | DCG.R    | Subcortical  | Heschl_R            | HES.R    | Sensorimotor |
| Cingulum_Post_L   | PCG.L    | Default mode | Temporal_Sup_L      | STG.L    | Sensorimotor |
| Cingulum_Post_R   | PCG.R    | Default mode | Temporal_Sup_R      | STG.R    | Sensorimotor |
| Hippocampus_L     | HIP.L    | Subcortical  | Temporal_Pole_Sup_L | TPOsup.L | Attention    |
| Hippocampus_R     | HIP.R    | Subcortical  | Temporal_Pole_Sup_R | TPOsup.R | Sensorimotor |
| ParaHippocampal_L | PHG.L    | Subcortical  | Temporal_Mid_L      | MTG.L    | Default mode |
| ParaHippocampal_R | PHG.R    | Subcortical  | Temporal_Mid_R      | MTG.R    | Default mode |
| Amygdala_L        | AMYG.L   | Subcortical  | Temporal_Pole_Mid_L | TPOmid.L | Subcortical  |
| Amygdala_R        | AMYG.R   | Subcortical  | Temporal_Pole_Mid_R | TPOmid.R | Subcortical  |
| Calcarine_L       | CAL.L    | Visual       | Temporal_Inf_L      | ITG.L    | Attention    |
| Calcarine_R       | CAL.R    | Visual       | Temporal_Inf_R      | ITG.R    | Default mode |
| Cuneus_L          | CUN.L    | Visual       |                     |          |              |
| Cuneus_R          | CUN.R    | Visual       |                     |          |              |

**Table S2.** Resting-state networks (RSNs) showing significant differences in the clustering coefficient ( $C_p$ )

| ROI | Name         | Frequency band | P (FDR) | SCHZ (SD)  | TD (SD)    |
|-----|--------------|----------------|---------|------------|------------|
| 2   | Visual       | Full-Frequency | 0.004   | 0.54(0.05) | 0.58(0.05) |
| 3   | Attention    | Slow 3         | 0.036   | 0.54(0.07) | 0.50(0.07) |
| 4   | Default Mode | Slow 3         | 0.036   | 0.54(0.06) | 0.51(0.07) |
| 5   | Subcortical  | Slow 3         | 0.014   | 0.53(0.05) | 0.49(0.06) |

**Table S3.** Resting-state networks (RSNs) showing significant differences in the local network efficiency ( $E_{loc}$ )

| ROI | Name         | Frequency band | P (FDR) | SCHZ (SD)  | TD (SD)    |
|-----|--------------|----------------|---------|------------|------------|
| 2   | Visual       | Full-Frequency | 0.011   | 0.76(0.03) | 0.89(0.03) |
| 1   | Sensorimotor | Slow 3         | 0.001   | 0.75(0.04) | 0.72(0.05) |
| 2   | Visual       | Slow 3         | 0.004   | 0.75(0.02) | 0.73(0.03) |
| 3   | Attention    | Slow 3         | 0.001   | 0.74(0.04) | 0.70(0.05) |
| 4   | Default Mode | Slow 3         | 0.001   | 0.75(0.03) | 0.71(0.04) |
| 5   | Subcortical  | Slow 3         | 0.001   | 0.74(0.03) | 0.69(0.04) |

**Table S4.** Brain regions showing significant differences in the clustering coefficient ( $C_p$ )

| ROI | Name            | Frequency band | Network      | P (FDR) | SCHZ (SD)  | TD (SD)    |
|-----|-----------------|----------------|--------------|---------|------------|------------|
| 17  | Rolandic_Oper_L | Full-Frequency | Sensorimotor | 0.001   | 0.55(0.05) | 0.61(0.07) |
| 18  | Rolandic_Oper_R | Full-Frequency | Sensorimotor | 0.031   | 0.56(0.06) | 0.60(0.07) |
| 43  | Calcarine_L     | Full-Frequency | Visual       | 0.031   | 0.54(0.07) | 0.59(0.08) |
| 44  | Calcarine_R     | Full-Frequency | Visual       | 0.001   | 0.55(0.07) | 0.62(0.08) |
| 45  | Cuneus_L        | Full-Frequency | Visual       | 0.040   | 0.58(0.07) | 0.62(0.08) |
| 47  | Lingual_L       | Full-Frequency | Visual       | 0.031   | 0.53(0.07) | 0.57(0.07) |
| 49  | Occipital_Sup_L | Full-Frequency | Visual       | 0.041   | 0.53(0.07) | 0.57(0.07) |
| 50  | Occipital_Sup_R | Full-Frequency | Visual       | 0.041   | 0.58(0.08) | 0.62(0.07) |
| 74  | Putamen_R       | Full-Frequency | Subcortical  | 0.031   | 0.52(0.06) | 0.56(0.08) |
| 76  | Pallidum_R      | Full-Frequency | Subcortical  | 0.031   | 0.56(0.06) | 0.60(0.07) |

|    |                   |                |              |       |            |            |
|----|-------------------|----------------|--------------|-------|------------|------------|
| 80 | Heschl_R          | Full-Frequency | Sensorimotor | 0.031 | 0.58(0.06) | 0.62(0.07) |
| 82 | Temporal_Sup_R    | Full-Frequency | Sensorimotor | 0.031 | 0.54(0.06) | 0.58(0.06) |
| 86 | Temporal_Mid_R    | Full-Frequency | Default Mode | 0.031 | 0.46(0.08) | 0.52(0.10) |
| 55 | Fusiform_L        | Slow 2         | Visual       | 0.033 | 0.56(0.07) | 0.49(0.09) |
| 21 | Olfactory_L       | Slow 3         | Subcortical  | 0.042 | 0.54(0.10) | 0.48(0.13) |
| 39 | ParaHippocampal_L | Slow 3         | Subcortical  | 0.038 | 0.56(0.07) | 0.51(0.09) |
| 40 | ParaHippocampal_R | Slow 3         | Subcortical  | 0.026 | 0.55(0.08) | 0.50(0.08) |
| 42 | Amygdala_R        | Slow 3         | Subcortical  | 0.038 | 0.57(0.08) | 0.51(0.10) |
| 55 | Fusiform_L        | Slow 3         | Visual       | 0.042 | 0.52(0.08) | 0.47(0.10) |
| 59 | Parietal_Sup_L    | Slow 3         | Sensorimotor | 0.006 | 0.55(0.12) | 0.46(0.12) |
| 60 | Parietal_Sup_R    | Slow 3         | Sensorimotor | 0.003 | 0.54(0.11) | 0.44(0.13) |
| 61 | Parietal_Inf_L    | Slow 3         | Attention    | 0.042 | 0.54(0.11) | 0.47(0.11) |
| 67 | Precuneus_L       | Slow 3         | Default Mode | 0.002 | 0.56(0.10) | 0.47(0.11) |
| 68 | Precuneus_R       | Slow 3         | Default Mode | 0.001 | 0.57(0.09) | 0.47(0.10) |
| 89 | Temporal_Inf_L    | Slow 3         | Attention    | 0.003 | 0.53(0.08) | 0.45(0.11) |
| 90 | Temporal_Inf_R    | Slow 3         | Default Mode | 0.003 | 0.52(0.07) | 0.45(0.11) |

**Table S5.** Brain regions showing significant differences in the local network efficiency ( $E_{loc}$ )

| ROI | Name                 | Frequency band | Network      | P (FDR) | SCHZ (SD)  | TD (SD)     |
|-----|----------------------|----------------|--------------|---------|------------|-------------|
| 17  | Rolandic_Oper_L      | Full-Frequency | Sensorimotor | 0.001   | 0.77(0.03) | 0.80(0.03)  |
| 44  | Calcarine_R          | Full-Frequency | Visual       | 0.007   | 0.76(0.04) | 0.80(0.04)  |
| 55  | Fusiform_L           | Slow 2         | Visual       | 0.015   | 0.76(0.04) | 0.71(0.07)  |
| 4   | Frontal_Sup_R        | Slow 3         | Default Mode | 0.047   | 0.73(0.08) | 0.069(0.11) |
| 5   | Frontal_Sup_Orb_L    | Slow 3         | Attention    | 0.049   | 0.77(0.07) | 0.74(0.09)  |
| 7   | Frontal_Mid_L        | Slow 3         | Attention    | 0.026   | 0.75(0.10) | 0.70(0.08)  |
| 12  | Frontal_Inf_Oper_R   | Slow 3         | Attention    | 0.014   | 0.74(0.07) | 0.59(0.11)  |
| 14  | Frontal_Inf_Tri_R    | Slow 3         | Attention    | 0.030   | 0.75(0.07) | 0.71(0.09)  |
| 15  | Frontal_Inf_Orb_L    | Slow 3         | Attention    | 0.034   | 0.74(0.06) | 0.70(0.09)  |
| 16  | Frontal_Inf_Orb_R    | Slow 3         | Attention    | 0.018   | 0.75(0.06) | 0.71(0.09)  |
| 19  | Supp_Motor_Area_L    | Slow 3         | Attention    | 0.049   | 0.76(0.09) | 0.71(0.12)  |
| 21  | Olfactory_L          | Slow 3         | Subcortical  | 0.001   | 0.75(0.08) | 0.67(0.11)  |
| 22  | Olfactory_R          | Slow 3         | Subcortical  | 0.001   | 0.74(0.07) | 0.68(0.09)  |
| 24  | Frontal_Sup_Medial_R | Slow 3         | Default Mode | 0.049   | 0.77(0.05) | 0.74(0.07)  |
| 27  | Rectus_L             | Slow 3         | Default Mode | 0.049   | 0.78(0.06) | 0.75(0.10)  |
| 28  | Rectus_R             | Slow 3         | Default Mode | 0.025   | 0.78(0.06) | 0.74(0.08)  |
| 33  | Cingulum_Mid_L       | Slow 3         | Subcortical  | 0.003   | 0.75(0.07) | 0.69(0.11)  |
| 34  | Cingulum_Mid_R       | Slow 3         | Subcortical  | 0.003   | 0.75(0.08) | 0.68(0.10)  |
| 35  | Cingulum_Post_L      | Slow 3         | Default Mode | 0.008   | 0.73(0.08) | 0.67(0.10)  |
| 38  | Hippocampus_R        | Slow 3         | Subcortical  | 0.003   | 0.76(0.06) | 0.70(0.9)   |
| 39  | ParaHippocampal_L    | Slow 3         | Subcortical  | 0.001   | 0.78(0.04) | 0.72(0.8)   |
| 40  | ParaHippocampal_R    | Slow 3         | Subcortical  | 0.002   | 0.77(0.05) | 0.72(0.9)   |
| 42  | Amygdala_R           | Slow 3         | Subcortical  | 0.001   | 0.77(0.05) | 0.71(0.09)  |
| 54  | Occipital_Inf_R      | Slow 3         | Visual       | 0.010   | 0.70(0.08) | 0.64(0.12)  |
| 55  | Fusiform_L           | Slow 3         | Visual       | 0.001   | 0.75(0.06) | 0.69(0.10)  |
| 56  | Fusiform_R           | Slow 3         | Visual       | 0.002   | 0.74(0.06) | 0.68(0.10)  |
| 58  | Postcentral_R        | Slow 3         | Sensorimotor | 0.034   | 0.76(0.07) | 0.72(0.11)  |
| 59  | Parietal_Sup_L       | Slow 3         | Sensorimotor | 0.001   | 0.75(0.09) | 0.66(0.10)  |
| 60  | Parietal_Sup_R       | Slow 3         | Sensorimotor | 0.001   | 0.74(0.08) | 0.64(0.11)  |
| 61  | Parietal_Inf_L       | Slow 3         | Attention    | 0.004   | 0.75(0.08) | 0.68(0.11)  |
| 64  | SupraMarginal_R      | Slow 3         | Sensorimotor | 0.049   | 0.74(0.07) | 0.70(0.10)  |
| 65  | Angular_L            | Slow 3         | Attention    | 0.001   | 0.74(0.06) | 0.67(0.10)  |
| 66  | Angular_R            | Slow 3         | Attention    | 0.013   | 0.74(0.09) | 0.69(0.09)  |
| 67  | Precuneus_L          | Slow 3         | Default Mode | 0.000   | 0.77(0.06) | 0.68(0.10)  |
| 68  | Precuneus_R          | Slow 3         | Default Mode | 0.000   | 0.78(0.08) | 0.69(0.10)  |

| ROI | Name                 | Frequency band | Network      | P (FDR) | SCHZ (SD)  | TD (SD)    |
|-----|----------------------|----------------|--------------|---------|------------|------------|
| 69  | Paracentral_Lobule_L | Slow 3         | Sensorimotor | 0.007   | 0.75(0.08) | 0.68(0.13) |
| 70  | Paracentral_Lobule_R | Slow 3         | Sensorimotor | 0.001   | 0.76(0.09) | 0.67(0.12) |
| 71  | Caudate_L            | Slow 3         | Subcortical  | 0.013   | 0.72(0.09) | 0.65(0.12) |
| 72  | Caudate_R            | Slow 3         | Subcortical  | 0.010   | 0.73(0.09) | 0.67(0.11) |
| 74  | Putamen_R            | Slow 3         | Subcortical  | 0.040   | 0.74(0.08) | 0.70(0.09) |
| 77  | Thalamus_R           | Slow 3         | Subcortical  | 0.015   | 0.70(0.10) | 0.63(0.12) |
| 78  | Heschl_L             | Slow 3         | Subcortical  | 0.002   | 0.70(0.10) | 0.62(0.07) |
| 83  | Temporal_Pole_Sup_L  | Slow 3         | Attention    | 0.034   | 0.75(0.10) | 0.71(0.08) |
| 84  | Temporal_Pole_Sup_R  | Slow 3         | Sensorimotor | 0.032   | 0.73(0.11) | 0.69(0.08) |
| 85  | Temporal_Mid_L       | Slow 3         | Default Mode | 0.032   | 0.71(0.11) | 0.66(0.07) |
| 86  | Temporal_Mid_R       | Slow 3         | Default Mode | 0.016   | 0.71(0.11) | 0.65(0.08) |
| 87  | Temporal_Pole_Mid_L  | Slow 3         | Subcortical  | 0.018   | 0.75(0.11) | 0.69(0.09) |
| 88  | Temporal_Pole_Mid_R  | Slow 3         | Subcortical  | 0.008   | 0.74(0.11) | 0.68(0.08) |
| 89  | Temporal_Inf_L       | Slow 3         | Subcortical  | 0.001   | 0.74(0.11) | 0.65(0.06) |
| 90  | Temporal_Inf_R       | Slow 3         | Default Mode | 0.001   | 0.75(0.12) | 0.75(0.5)  |
